# Supplementary material for: Synthesis, characterization, and mechanism analysis of S = 2 quasi-one-dimensional ferromagnetic semiconductor Pb2Mn(VO4)2(OH)
Source: Royal Society of Chemistry journal article supplement (doi:10.1039/c6dt00412a), 2016-01-01
Supplement: c6dt00412a1.pdf [file c6dt00412a1.pdf]

# Supporting Information

## Synthesis, Characterization, and Mechanism Analysis of $S=2$

### Quasi-One-Dimensional Ferromagnetic Semiconductor

#### $\text{Pb}_2\text{Mn}(\text{VO}_4)_2(\text{OH})$

Suyun Zhang,<sup>a</sup> Hongping Xiang,<sup>\*a</sup> Wenbin Guo,<sup>a</sup> Yingying Tang<sup>a,b</sup>, Meiyan Cui<sup>a,b</sup> and  
Zhangzhen He<sup>\*a</sup>

<sup>a</sup>State Key Laboratory of Structural Chemistry, Fujian Institute of Research on the Structure of Matter, Chinese Academy of Sciences, Fuzhou 350002, P. R. China.

<sup>b</sup>University of Chinese Academy of Sciences, Beijing, 100049, P. R. China.

E-mail: [xianghp@fjirsm.ac.cn](mailto:xianghp@fjirsm.ac.cn), [hcz1988@hotmail.com](mailto:hcz1988@hotmail.com) or [hezz@fjirsm.ac.cn](mailto:hezz@fjirsm.ac.cn).

Tel/Fax: +86-591-63173255.

Table S1. Atomic coordinates ( $\times 10^4$ ) and equivalent isotropic displacement parameters ( $\text{\AA}^2 \times 10^3$ ) for  $\text{Pb}_2\text{Mn}(\text{VO}_4)_2(\text{OH})$ .

| atom  | x        | y      | z         | U(eq) |
|-------|----------|--------|-----------|-------|
| Pb(1) | 2702(1)  | 2500   | 7529(1)   | 19(1) |
| Pb(2) | 6695(1)  | 2500   | 15934(1)  | 26(1) |
| Mn(1) | 0        | 0      | 0         | 8(1)  |
| V(1)  | 407(2)   | 2500   | 3359(2)   | 9(1)  |
| V(2)  | 4495(2)  | 2500   | 11759(2)  | 9(1)  |
| O(1)  | -1701(9) | 2500   | -752(9)   | 10(2) |
| O(2)  | -116(7)  | 130(9) | 2160(7)   | 16(1) |
| O(3)  | -780(11) | 2500   | 4597(10)  | 21(2) |
| O(4)  | 2676(10) | 2500   | 4540(10)  | 21(2) |
| O(5)  | 5590(10) | 2500   | 10426(11) | 26(2) |
| O(6)  | 2113(9)  | 2500   | 10588(9)  | 12(2) |
| O(7)  | 5116(7)  | 235(9) | 12989(7)  | 14(1) |

U(eq) is defined as one third of the trace of the orthogonalized Uij tensor.

Table S2. Selected bond length ( $\text{\AA}$ ) and bond angles ( $^\circ$ ) in  $\text{Pb}_2\text{Mn}(\text{VO}_4)_2(\text{OH})$ .

|               |          |                 |          |
|---------------|----------|-----------------|----------|
| Pb(1)-O(7)#1  | 2.531(5) | Pb(1)-O(7)#2    | 2.531(5) |
| Pb(1)-O(4)    | 2.617(8) | Pb(1)-O(2)#3    | 2.652(6) |
| Pb(1)-O(2)#4  | 2.652(6) | Pb(1)-O(5)      | 2.701(8) |
| Pb(2)-O(7)#5  | 2.573(6) | Pb(2)-O(7)#6    | 2.573(5) |
| Pb(2)-O(3)#7  | 2.604(8) | Pb(2)-O(1)#8    | 2.718(8) |
| Pb(2)-O(7)    | 2.800(2) | Pb(2)-O(7)#9    | 2.800(2) |
| Mn-O(2)#9     | 1.932(6) | Mn-O(2)         | 1.932(6) |
| Mn-O(1)       | 1.973(4) | Mn-O(1)#10      | 1.973(4) |
| Mn-O(6)#3     | 2.160(5) | Mn-O(6)#11      | 2.160(5) |
| Mn-Mn#12      | 3.084(3) | Mn-Mn#13        | 3.084(3) |
| V(1)-O(3)     | 1.651(8) | V(1)-O(4)       | 1.673(7) |
| V(1)-O(2)     | 1.761(6) | V(1)-O(2)#9     | 1.761(6) |
| V(2)-O(5)     | 1.670(8) | V(2)-O(7)#9     | 1.724(6) |
| V(2)-O(7)     | 1.724(6) | V(2)-O(6)       | 1.742(7) |
| Mn#12-O(1)-Mn | 102.8(3) | Mn#14-O(6)-Mn#4 | 91.1(3)  |

Symmetry transformations used to generate equivalent atoms:

#1 -x+1, y+1/2, -z+2; #2 -x+1, -y, -z+2; #3 -x, -y, -z+1; #4 -x, y+1/2, -z+1; #5 -x+1, -y, -z+3; #6 -x+1, y+1/2, -z+3; #7 x+1, y, z+1; #8 x+1, y, z+2; #9 x, -y+1/2, z; #10 -x, -y, -z; #11 x, y, z-1; #12 -x, y+1/2, -z; #13 -x, y-1/2, -z; #14 x, y, z+1.

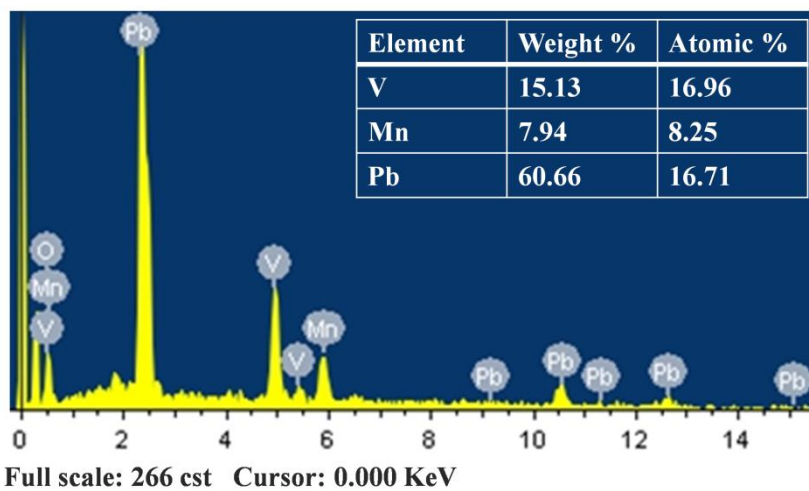

Figure S1. The EDS analysis of  $\text{Pb}_2\text{Mn}(\text{VO}_4)_2(\text{OH})$  confirms the Pb/Mn/V/O elemental composition.

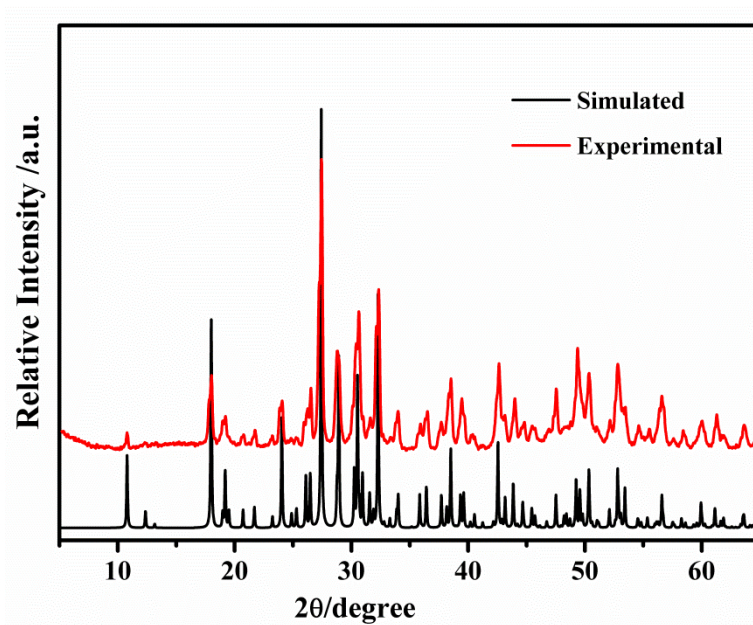

Figure S2. Experimental and calculated powder X-ray diffraction patterns of  $\text{Pb}_2\text{Mn}(\text{VO}_4)_2(\text{OH})$ .

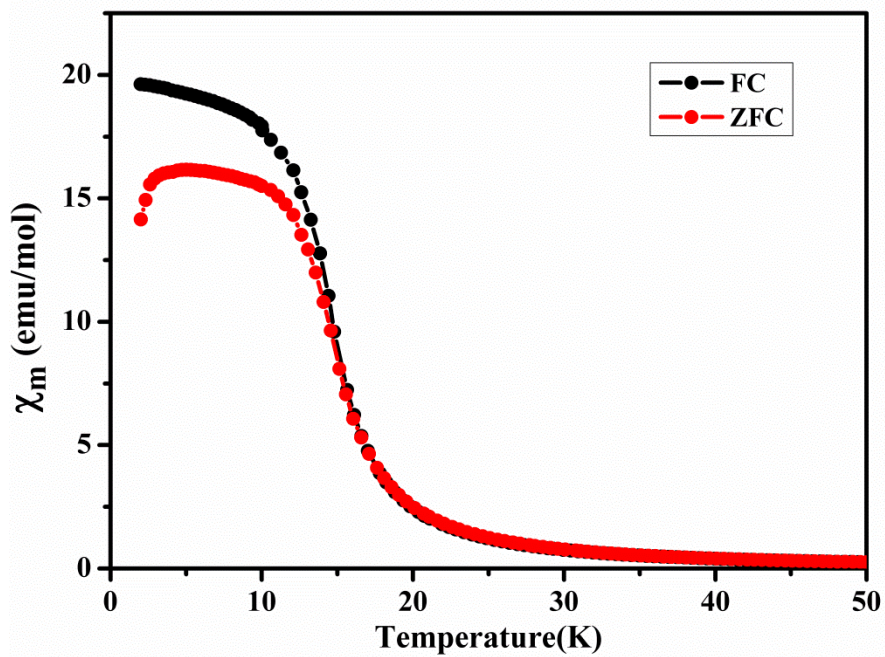

Figure S3. Field cooled (*FC*) and zero-field cooled (*ZFC*) plots of  $\chi_m$  vs.  $T$  at  $H = 500$  Oe.

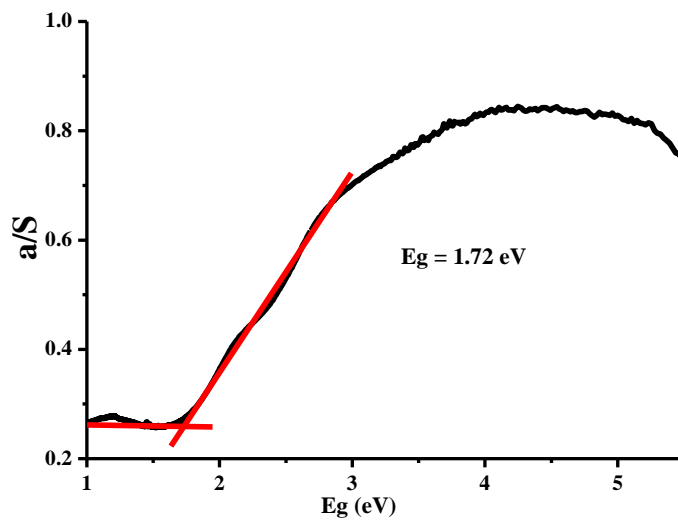

Figure S4. Diffuse reflectance spectrum of  $\text{Pb}_2\text{Mn}(\text{VO}_4)_2(\text{OH})$ .

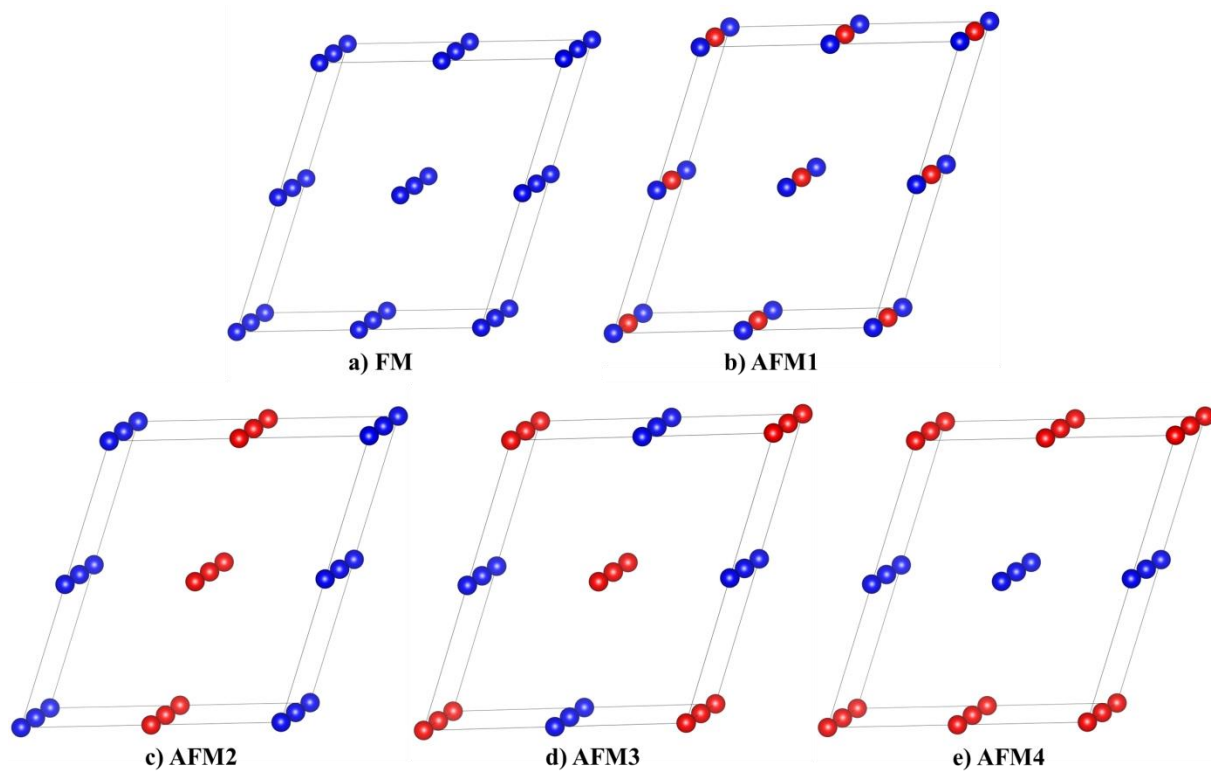

Figure S5. Five magnetic structures are designed as (a) FM, (b) AFM1, (c) AFM2, (d) AFM3, and (e) AFM4, to figure out the magnetic ground state of  $\text{Pb}_2\text{Mn}(\text{VO}_4)_2(\text{OH})$ . Blue and red spheres indicate different orientations of the spin moments residing on the  $\text{Mn}^{3+}$  ions, which are the only atoms shown.
